# Supplementary material
Source: publisher figshare collection journal article supplement (https://karger.figshare.com/ndownloader/files/12917381)
Supplement: Supplementary file 1 [file 12917381]

**Supplementary figure: Post treatment writing tests were performed 2 (not shown), 7, 11 and 16 weeks post 3x8 weeks with daily T-PEMF treatment. D: 7 weeks after, E: 11 weeks after, F: 16 weeks after.**

D

Vi mangler din aflevering af el-måler  
Vi har endnu ikke fået din sidste aflevering  
af el-måler 156917 på adressen  
404. Tjalling  
Derfor opkræver vi et gebyr på 93,75 kr  
inkl. moms, med mindre vi modtager din  
aflevering senest d. 10 august.

E

Vi mangler din aflevering af el-måler  
Vi har endnu ikke fået din sidste aflevering  
af el-måler 156917 på ~~den~~ adressen  
404. Tjalling  
Derfor opkræver vi et gebyr på 93,75 kr.  
inkluderet moms, med mindre vi  
modtager din aflevering senest d. 10 august.

F

Så sidder jeg her igen. Vejret er godt, men lidt  
koldt efter årstiden. Børnene er, så er det lige et  
vejr til at gå der. Det var meget himmel  
Ple kommer hjem, den kan jeg gå på grund af  
at jeg meget bed er skuld.  
Skuld bruger det en ordentlig omgang - redirekt,  
myt by og indlæg. Så skal de fleste komme  
over de 15°C kan jeg lægge tegning på. Det  
bliver meget skinner at se på, men den med det  
præmie kommer veck.
